# Supplementary material
Source: Royal Society of Chemistry journal article supplement (doi:10.1039/d5nr04893a)
Supplement: d5nr04893a1.pdf [file d5nr04893a1.pdf]

PAPER

Supplementary material

Geometry-Driven Dimensional Crossover from Weak Localization to Superconducting Fluctuations in Nanostructured NbN Networks

Priyank Tripathi,<sup>a,b</sup> Debashree Nayak<sup>c</sup>, Mandeep Kaur<sup>a,b</sup>, Sahil Verma<sup>a,b</sup>, Kartik Senapati<sup>c</sup>, Sudhir Husale<sup>a,b\*</sup>

Table of Content:

TableS1 : Reported  $T_c$  with thickness in NbN superconducting film

| S.No. | Film material     | Substrate                          | Technique                             | Thickness (nm)  | $T_c$ (K) | References   |
|-------|-------------------|------------------------------------|---------------------------------------|-----------------|-----------|--------------|
| 1.    | NbN               | Sapphire                           | Reactive sputtering                   | 500             | 15.2      | [1]          |
|       |                   |                                    |                                       | 2.5             | 6.5       |              |
| 2.    | NbN               | MgO                                | Reactive sputtering                   | >50             | 9.9-16.1  | [2]          |
| 3.    | NbN               | MgO                                | Reactive sputtering                   | >50             | 2.7-16.8  | [3]          |
| 4.    | NbN               | MgO                                | Reactive sputtering                   | >50             | 11.9      | [4]          |
| 5.    | NbN               | MgO                                | PLD                                   | 100             | 16        | [5]          |
| 6.    | NbN               | Sapphire                           | HTCVD                                 | 40              | 17        | [6]          |
| 7.    | NbN               | AlN/Al <sub>2</sub> O <sub>3</sub> | PVD epitaxy                           | 5               | 11        | [7]          |
|       |                   |                                    |                                       | 50              | 15        |              |
| 8.    | NbN               | AlN/Al <sub>2</sub> O <sub>3</sub> | PVD                                   | 5               | 11.2      | [8]          |
|       |                   |                                    |                                       | 50              | 15.3      |              |
| 9.    | NbN               | Si+AlN buffer                      | Reactive sputtering                   | 5               | 9.9       | [9]          |
|       |                   |                                    |                                       | 50              | 14.5      |              |
| 10.   | NbN               | Si (Flexible)                      | Magnetron sputtering                  | 10              | 8.3       | [10]         |
|       |                   |                                    |                                       | 50              | 11.9      |              |
|       |                   |                                    |                                       | 100             | 12.4      |              |
| 11.   | NbN               | Si                                 | Ion-assisted sputtering               | 100             | 13        | [11]         |
| 12.   | NbN               | Si                                 | DC Magnetron sputtering               | 100             | 16        | [12]         |
| 13.   | NbN               | MgO                                | PLD                                   | 50              | 13.1      | [13]         |
|       |                   | Al <sub>2</sub> O <sub>3</sub>     |                                       | 50              | 15.2      |              |
|       |                   | Sapphire                           |                                       | 50              | 16.6      |              |
| 14.   | NbN               | Si                                 | Ion beam sputtering                   | 100             | 13        | [14]         |
| 15.   | NbN               | Si                                 | Reactive sputtering                   | 200             | 12.8      | [15]         |
| 16.   | $\epsilon$ -NbN   | Bulk sample                        | HPHT synthesis                        | Bulk            | 11.6      | [16]         |
|       | $\delta$ -NbN     |                                    |                                       | polycrystalline | 17.5      |              |
| 17.   | Nb <sub>2</sub> N | Si <sub>3</sub> N <sub>4</sub> /Si | DC Magnetron sputtering + nitridation | 16              | 0.73      | [17]         |
|       |                   |                                    |                                       | 11              | 0.68      |              |
|       |                   |                                    |                                       | 8               | 0.62      |              |
| 18.   | NbN               | SiO <sub>2</sub>                   | DC Magnetron sputtering               | 144             | 13.8      | Present work |
|       |                   | SiN                                |                                       | 144             | 14.55     |              |

Table S1 : Compilation of reported superconducting transition temperatures ( $T_c$ ) of NbN thin films as a function of film thickness from the literature. The table summarizes the film material, substrate, growth technique, thickness, and corresponding  $T_c$  values reported in previous studies. For consistency across different reports,  $T_c$  values correspond to the **zero-resistance transition temperature ( $T_{c0}$ )** wherever available. The dataset spans a wide range of film thicknesses and deposition techniques including reactive sputtering, magnetron sputtering,

<sup>a</sup> Academy of Scientific and Industrial Research (AcSIR), Ghaziabad-201002, India.

<sup>b</sup> Council of Scientific and Industrial Research, National Physical Laboratory, Dr. K.S. Krishnan Marg, New Delhi – 110012, India.

<sup>c</sup> School of Physical Sciences, National Institute of Science Education and Research (NISER) Bhubaneswar, An OCC of Homi Bhabha National Institute, Jatni-752050, Odisha, India.

\* Correspondance Email : [husale@csir.res.in](mailto:husale@csir.res.in)

pulsed laser deposition (PLD), chemical vapor deposition, and ion-assisted sputtering. Data for  $\text{Nb}_2\text{N}$  and  $\epsilon\text{-NbN}$  phases are also included for comparison with related niobium nitride systems. The final entry corresponds to the NbN film investigated in the present work.

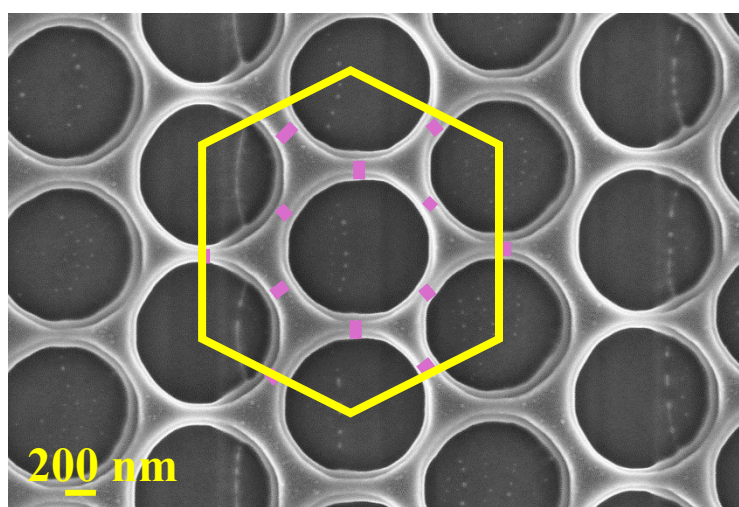

**Supplementary Figure S1.** FESEM image of NbN-NR3 device , Yellow hexagon is denoting the one unit cell and purple color lines are weak link spacing (s)

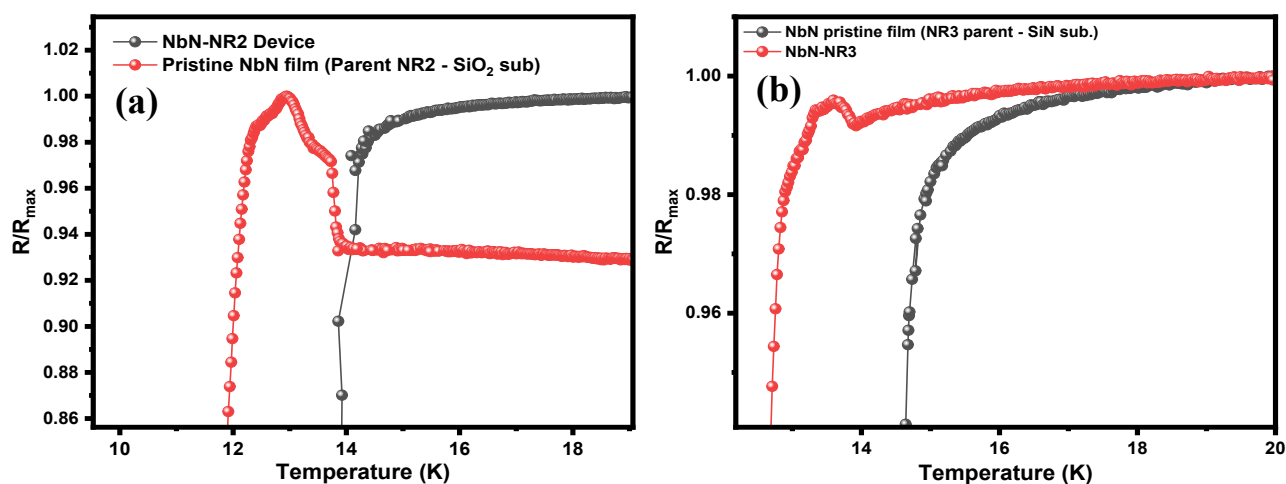

**Supplementary Figure S2.** Comparison between pristine and patterned NbN films. (a)  $R$ - $T$  of the pristine NbN parent film for NbN-NR2 (144 nm, unpatterned): resistance decreases monotonically above  $T_c$  with no WL-SCF crossover. (b)  $R$ - $T$  of the independently fabricated NbN-NR3 device ( $s \approx 97.87$  nm, SiN substrate) showing the same WL-SCF crossover as NR2, confirming that the crossover is geometry-driven and reproducible across devices on different substrates.

Monte Carlo: 30 keV Ga<sup>+</sup> → NbN | Rp = 10.2 nm | ΔRp = 8.0 nm | Lat = 11.4 nm | Film retention = 64%

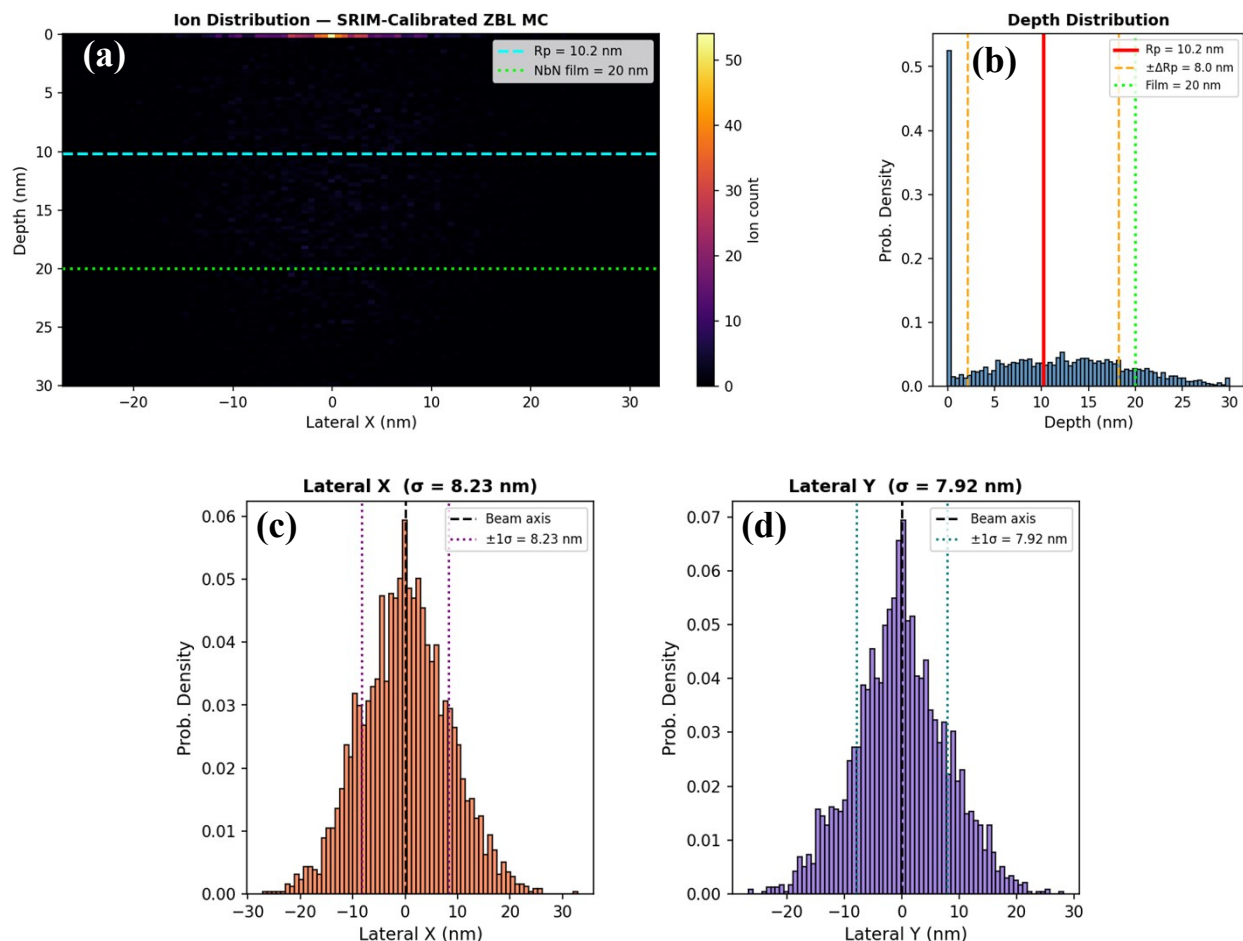

**Supplementary Figure S3.** SRIM/ZBL Monte Carlo simulations of Ga<sup>+</sup> ion damage in NbN (144 nm). (a) Ion range and lateral straggle distributions for 30 keV Ga<sup>+</sup> incident on NbN (b) . Depth profile of FIB milling. (d) Schematic cross-section showing undamaged NbN core (~35–52 nm) flanked by ~23 nm damaged edge zones on each side, consistent with projected range ~10 nm and lateral straggle ~8 nm.

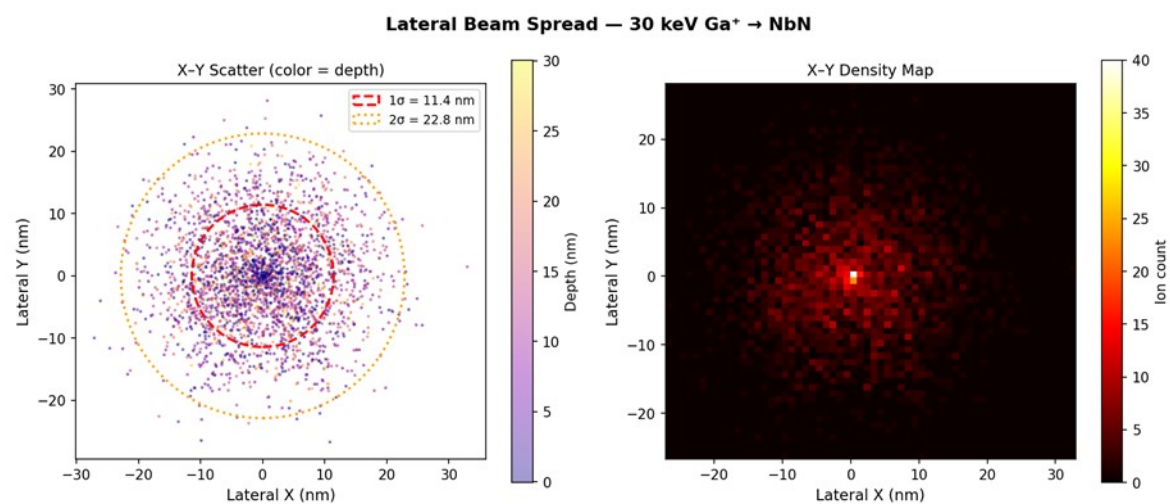

**Supplementary Figure S4.** Cross-section showing undamaged NbN core (~35–52 nm) flanked by ~23 nm damaged edge zones on each side. (a) 2D-scatter plot for showing the ion distribution around the hole edges. (b) 2D-ion density color map.

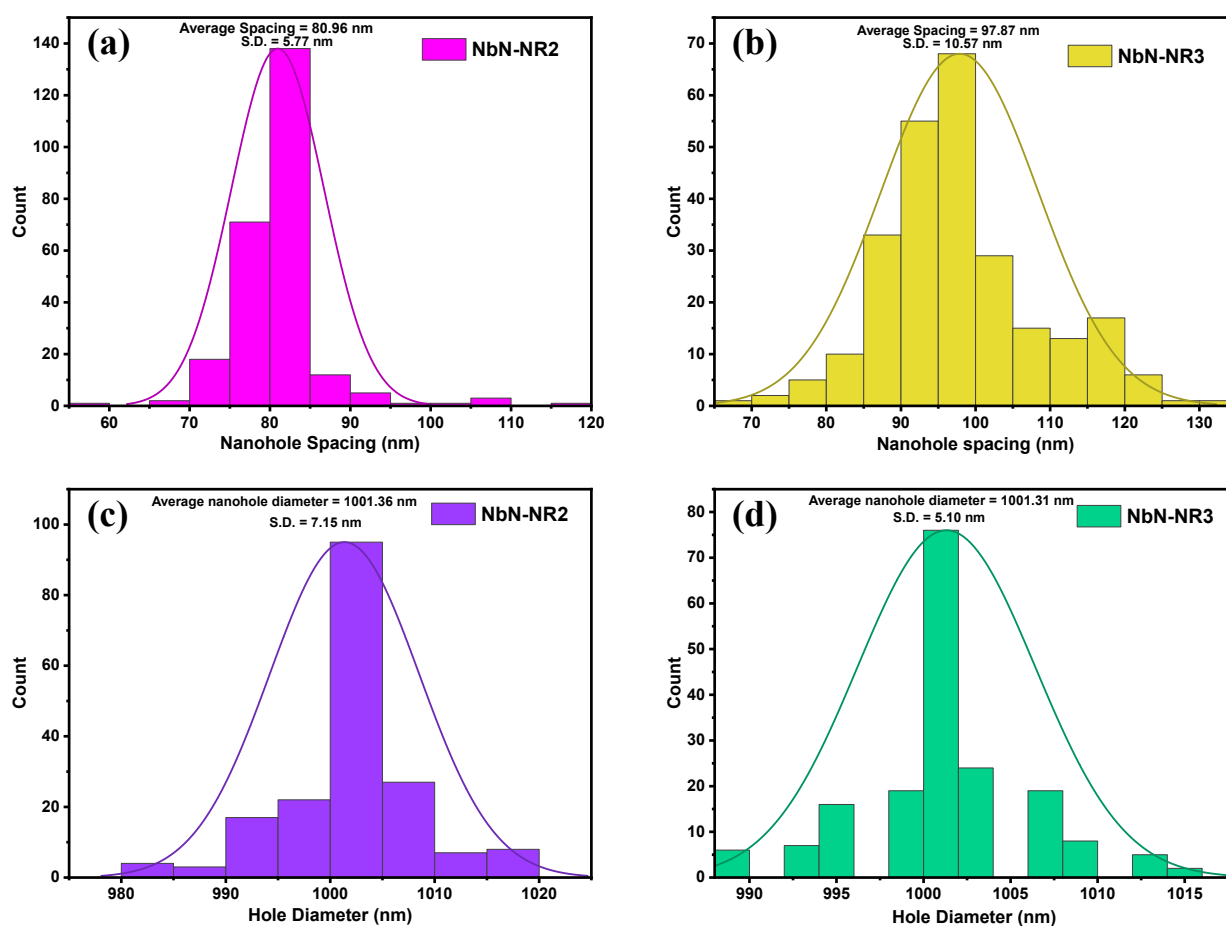

**Supplementary Figure S5.** Statistical characterization of FIB nanohole geometry. (a) Edge-to-edge spacing histogram for NR2  $\sim 81 \pm 6$  nm, narrow Gaussian confirming uniformity. (b) Edge-to-edge spacing histogram for NR3  $\sim 98 \pm 10$  nm. (c) Hole diameter histogram for NR2  $\sim 1001 \pm 7$  nm. (d) Hole diameter histogram for NR3  $\sim 1001 \pm 5$  nm. The narrow distributions demonstrate statistical uniformity of the FIB network; the resulting  $T_c$  variation of  $\sim 0.1$ – $0.2$  K is negligible compared to the multi-kelvin transport features observed.

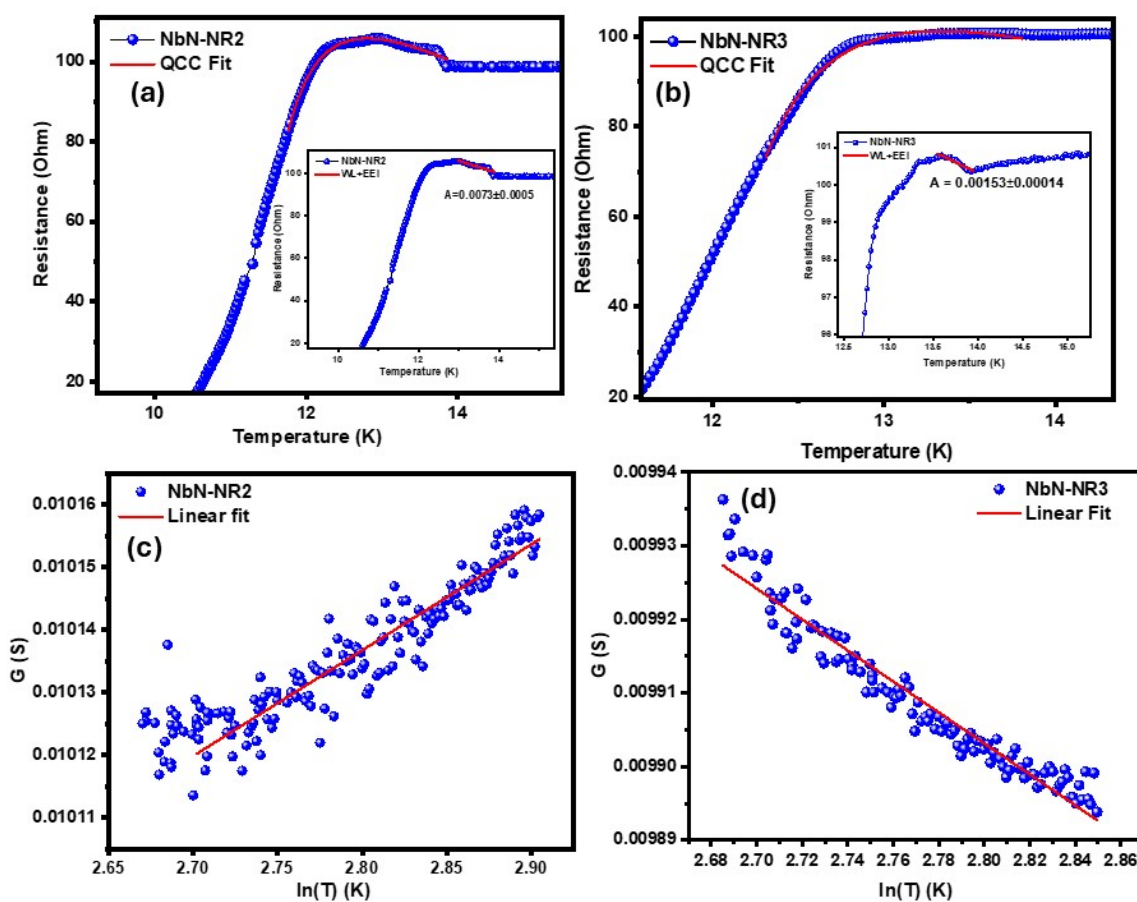

**Supplementary Figure S6.** QCC composite model fit. (a) QCC fit for NbN-NR2 inset is showing WL+EEI fit in resistance upturn region. (b) QCC fit for NbN-NR3 inset is showing WL+EEI fit in resistance upturn region. (c)  $G$  vs  $\ln(T)$  for multi-kelvin temperature scale transport confirms long range competition of WL+SCF dominated 2D transport behavior for NbN-NR2. (d)  $G$  vs  $\ln(T)$  for multi-kelvin temperature scale transport confirms competition of WL+SCF dominated 2D transport behavior for NbN-NR3.

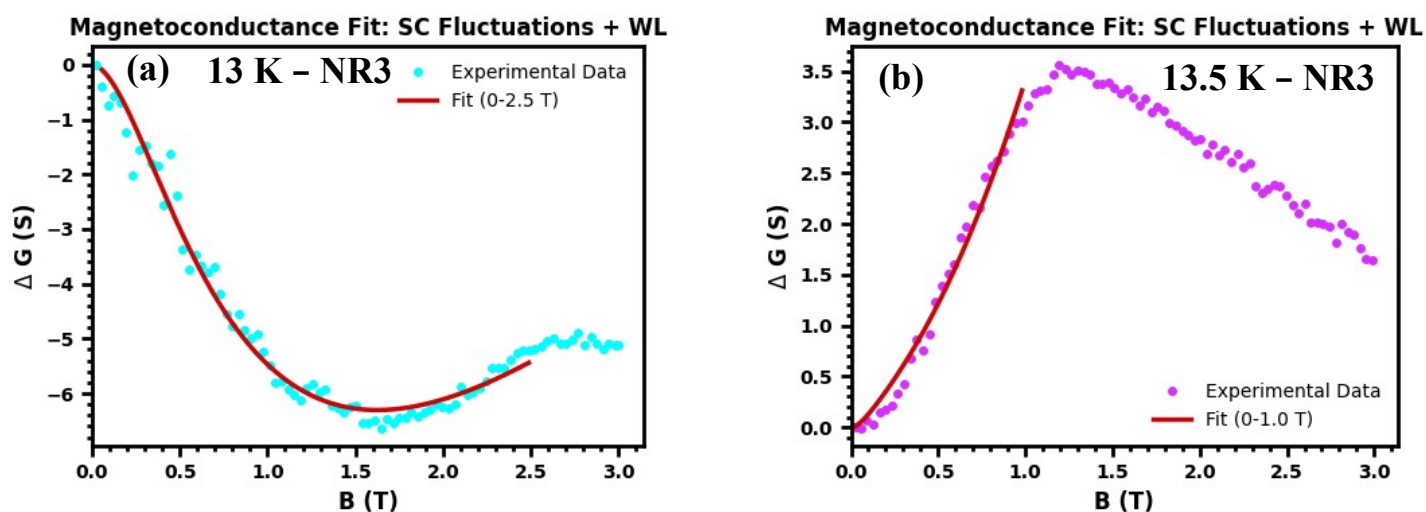

**Supplementary Figure S7.** Modified HLN magnetoconductance fitting for NbN-NR3 at  $T^* = 13$  K and  $T_{\text{peak}} = 13.5$  K. (a)  $\Delta G$  vs.  $B$  at  $T = 13$  K (crossover temperature  $T^*$ ): experimental data (cyan) and SCF+WL combined fit (red, 0–2.5 T). A clear conductance valley confirms simultaneous SCF and WL activity. Extracted:  $B_{\phi} = 0.0175$  T,  $B_{\text{SF}} = 0.3839$  T,  $l_{\phi} = 96.99$  nm  $\approx s = 97.87$  nm, SCF/WL ratio = 1.054 (balanced — true crossover). (b)  $\Delta G$  vs.  $B$  at  $T = 13.5$  K ( $T_{\text{peak}}$ ): monotonically negative magnetoconductance (SCF-dominated, fit 0–1.05 T), no WL upturn. Extracted:  $B_{\phi} = 0.0407$  T,  $B_{\text{SF}} = 2.384$  T,  $l_{\phi} = 63.6$  nm ( $l_{\phi}/s = 0.650 < 1$ , crossover not yet satisfied), SCF/WL = 0.917 (WL dominant).

| T (K) | $B_{\phi}$ (T) | $B_{\text{SF}}$ (T) | $\tau_{\text{GL}}$ (ps) | $D$ ( $\text{cm}^2/\text{s}$ ) | $\tau_{\phi}$ (ps) | $l_{\phi}$ (nm) | $l_{\text{r}}$ (nm) | $\xi$ (nm) |
|-------|----------------|---------------------|-------------------------|--------------------------------|--------------------|-----------------|---------------------|------------|
| 13    | 0.0175         | 0.3839              | 2.612                   | 1.642                          | 57.295             | 96.99           | 24.63               | 3.87       |
| 13.5  | 0.0407         | 2.384               | 1.8415                  | 0.375                          | 107.87             | 63.6            | 11.55               | 1.84       |

**Table S2.** Characteristic parameters for NbN-NR3 at  $T^* = 13$  K and  $T_{\text{peak}} = 13.5$  K.

| T (K) | C1 (AL) | C2 (MT) | C3 (WL) | C1+C2 (SCF) | SCF/WL ratio | Status      |
|-------|---------|---------|---------|-------------|--------------|-------------|
| 13    | 0.3851  | 0.1282  | 0.4866  | 0.5133      | 1.054        | Balanced    |
| 13.5  | 0.0933  | 0.3945  | 0.5317  | 0.4878      | 0.917        | WL dominant |

**Table S3.** Relative coefficients for NbN-NR3 at  $T^* = 13$  K and  $T_{\text{peak}} = 13.5$  K.

| Parameter                       | NbN-NR2 | NbN-NR3 |
|---------------------------------|---------|---------|
| FIB spacing $s$ (nm)            | 80.97   | 97.87   |
| $B_{\phi}$ at crossover (mT)    | 21.35   | 17.50   |
| $l_{\phi}$ from $B_{\phi}$ (nm) | 87.8    | 97.0    |
| $l_{\phi} / s$                  | 1.08    | 0.99    |
| $B_{SF}$ at crossover (mT)      | 230.9   | 383.9   |
| $l_T$ from $B_{SF}$ (nm)        | 37.76   | 29.28   |

**Table S4.** Parameters extracted from modified HLN fitting at the WL–SCF crossover for NR2 and NR3.

| Criterion                 | $T = 13.5 \text{ K}$ ( $T_{\text{peak}}$ ) | $T = 13 \text{ K}$ ( $T^*$ ) |
|---------------------------|--------------------------------------------|------------------------------|
| $l_{\phi}$ (nm)           | 63.6                                       | 96.99                        |
| $l_{\phi} / s$            | 0.650                                      | 0.991                        |
| SCF/WL ratio $(C1+C2)/C3$ | 0.917 (WL dominant)                        | 1.054 (balanced )            |
| $B_{SF}$ (T)              | 2.384                                      | 0.384                        |

**Table S5.** Four-criterion crossover diagnostic for NbN-NR3.

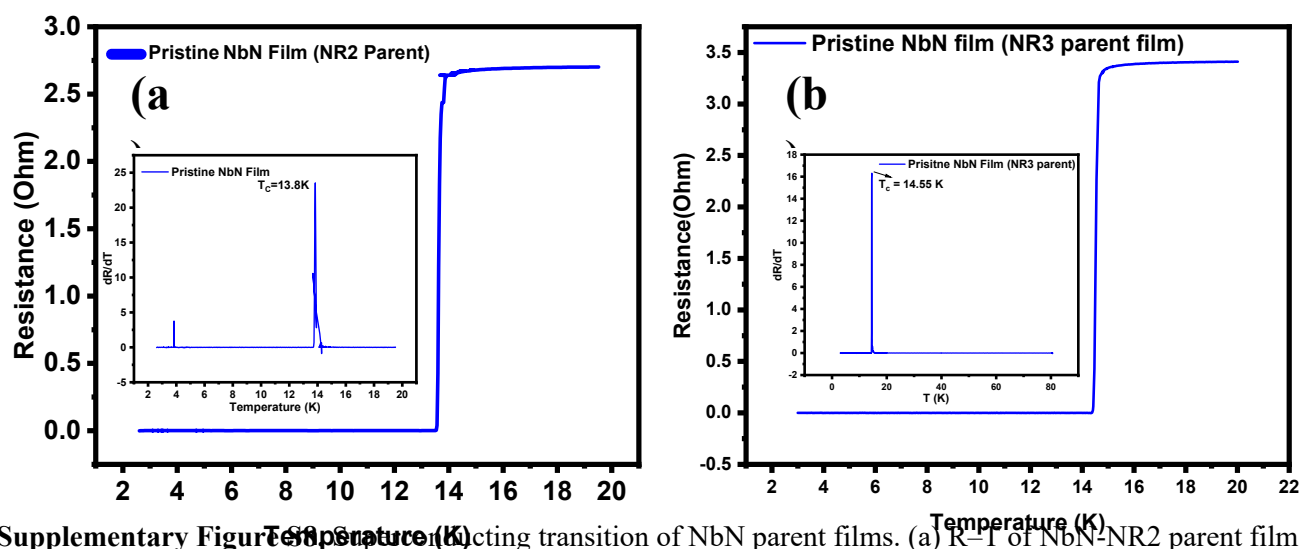

**Supplementary Figure S6.** Superconducting transition of NbN parent films. (a) R–T of NbN-NR2 parent film (144 nm, SiO<sub>2</sub>): T<sub>c</sub> = 13.8 K, exceeding the as-deposited benchmark of Ref. [12] (T<sub>c</sub> ~ 11.8 K, same power, no annealing), confirming above-benchmark film quality. (b) R–T of NbN-NR3 parent film (144 nm, SiN): T<sub>c</sub> = 14.55 K, surpassing the Chockalingam et al. power-matched value of 11.61 K at 40 W (Phys. Rev. B 77, 214503).

## References

- Gavaler, J.R., Janocko, M.A., Hulm, J.K. and Jones, C.K., 1971. Superconducting properties as a function of thickness in NbN films. *Physica*, 55, pp.585-591.
- Chockalingam, S.P., Chand, M., Jesudasan, J., Tripathi, V. and Raychaudhuri, P., 2008. Superconducting properties and Hall effect of epitaxial NbN thin films. *Physical Review B—Condensed Matter and Materials Physics*, 77(21), p.214503.
- Chand, M., Mishra, A., Xiong, Y.M., Kamlapure, A., Chockalingam, S.P., Jesudasan, J., Bagwe, V., Mondal, M., Adams, P.W., Tripathi, V. and Raychaudhuri, P., 2009. Temperature dependence of resistivity and Hall coefficient in strongly disordered NbN thin films. *Physical Review B—Condensed Matter and Materials Physics*, 80(13), p.134514.
- Chand, M., Saraswat, G., Kamlapure, A., Mondal, M., Kumar, S., Jesudasan, J., Bagwe, V., Benfatto, L., Tripathi, V. and Raychaudhuri, P., 2012. Phase diagram of the strongly disordered s-wave superconductor NbN close to the metal-insulator transition. *Physical Review B—Condensed Matter and Materials Physics*, 85(1), p.014508.
- Shapoval, T., Stopfel, H., Haindl, S., Engelmann, J., Inosov, D.S., Holzapfel, B., Neu, V. and Schultz, L., 2011. Quantitative assessment of pinning forces and magnetic penetration depth in NbN thin films from complementary magnetic force microscopy and transport measurements. *Physical Review B—Condensed Matter and Materials Physics*, 83(21), p.214517.
- Hazra, D., Tsavdaris, N., Jebari, S., Grimm, A., Blanchet, F., Mercier, F., Blanquet, E., Chapelier, C. and Hofheinz, M., 2016. Superconducting properties of very high quality NbN thin films grown by high temperature chemical vapor deposition. *Superconductor Science and Technology*, 29(10), p.105011.
- Wei, X., Roy, P., Yang, Z., Zhang, D., He, Z., Lu, P., Licata, O., Wang, H., Mazumder, B., Patibandla, N. and Cao, Y., 2021. Ultrathin epitaxial NbN superconducting films with high upper critical field grown at low temperature. *Materials Research Letters*, 9(8), pp.336-342.
- Licata, O.G., Sarker, J., Bachhav, M., Roy, P., Wei, X., Yang, Z., Patibandla, N., Zeng, H., Zhu, M., Jia, Q. and Mazumder, B., 2022. Correlation between thickness dependent nanoscale structural chemistry and superconducting properties of ultrathin epitaxial NbN films. *Materials Chemistry and Physics*, 282, p.125962.
- Yang, Z., Wei, X., Roy, P., Zhang, D., Lu, P., Dhole, S., Wang, H., Cucciniello, N., Patibandla, N., Chen, Z. and Zeng, H., 2023. CMOS-Compatible Ultrathin Superconducting NbN Thin Films Deposited by Reactive Ion Sputtering on 300 mm Si Wafer. *Materials*, 16(23), p.7468.
- Shi, H., Liang, L., Huang, Y., Bao, H., Jin, B., Wang, Z., Jia, X., Kang, L., Xu, W., Chen, J. and Wu, P., 2022. NbN films on flexible and thickness controllable dielectric substrates. *Scientific Reports*, 12(1), p.10662.
- Kosutova, T., Yao, Y., Fernandes, D., Zhang, Z., Zhang, S.L., Gustavo, F., Lefloch, F. and Kubart, T., 2025. Ion-assisted sputter-deposition of superconducting NbN thin films on silicon. *Superconductor Science and Technology*, 38(9), p.095010.
- Pei, Y., Fan, Q., Ni, X. and Gu, X., 2024. Controlling the Superconducting Critical Temperature and Resistance of NbN Films through Thin Film Deposition and Annealing. *Coatings*, 14(4), p.496.
- Volkov, S., Gregor, M., Roch, T., Satrapinskyy, L., Grančič, B., Fiantok, T. and Plecenik, A., 2019. Superconducting properties of very high quality NbN thin films grown by pulsed laser deposition. *Journal of Electrical Engineering*, 70(7), pp.89-94.
- Polakovic, T., Lendinez, S., Pearson, J.E., Hoffmann, A., Yefremenko, V., Chang, C.L., Armstrong, W., Hafidi, K., Karapetrov, G. and Novosad, V., 2018. Room temperature deposition of superconducting niobium nitride films by ion beam assisted sputtering. *APL materials*, 6(7).
- Kalal, S., Gupta, M. and Rawat, R., 2021. N concentration effects on structure and superconductivity of NbN thin films. *Journal of Alloys and Compounds*, 851, p.155925.
- Zou, Y., Qi, X., Zhang, C., Ma, S., Zhang, W., Li, Y., Chen, T., Wang, X., Chen, Z., Welch, D. and Zhu, P., 2016. Discovery of superconductivity in hard hexagonal  $\epsilon$ -NbN. *Scientific reports*, 6(1), p.22330.
- Gajar, B., Yadav, S., Sawle, D., Maurya, K.K., Gupta, A., Aloysius, R.P. and Sahoo, S., 2019. Substrate mediated nitridation of niobium into superconducting Nb<sub>2</sub>N thin films for phase slip study. *Scientific reports*, 9(1), p.8811.
